# Supplementary material
Source: publisher figshare collection journal article supplement (https://asha.figshare.com/articles/dataset/_/22233664)
Supplement: Supplementary file 1 [file 1]

**Supplemental Material S2.** Sixteen different picture sequences.

| No. | Alphabet Sequences |
|-----|--------------------|
| 1.  | A-B-D-C            |
| 2.  | D-C-A-B            |
| 3.  | B-D-C-A            |
| 4.  | C-A-B-D            |
| 5.  | C-D-B-A            |
| 6.  | B-A-C-D            |
| 7.  | A-C-D-B            |
| 8.  | D-B-A-C            |
| 9.  | A-D-B-C            |
| 10. | B-C-D-A            |
| 11. | D-A-C-B            |
| 12. | C-B-A-D            |
| 13. | C-B-D-A            |
| 14. | A-D-C-B            |
| 15. | B-C-A-D            |
| 16. | D-A-B-C            |

*Note.* Each letter represents a particular picture stimulus.
