# Supplementary material
Source: publisher figshare collection journal article supplement (https://asha.figshare.com/articles/dataset/_/22233664)
Supplement: Supplementary file 2 [file 1]

# Supplemental Material S1. Four screenings as inclusion criteria.

| Inclusion Criterion    | Test/Task                                                         | Cutoff Score/Range                                                  |
|------------------------|-------------------------------------------------------------------|---------------------------------------------------------------------|
| Cognitive screening    | Bangla Montreal Cognitive Assessment<br>(Nasreddine et al., 2005) | Young and middle age: $\geq 26$ ; older age: $\geq 22$              |
| Vision screening       | Rosenbaum Vision Pocket Screener<br>(Rosenbaum, 1982)             | Young and middle age: up to 20/20 line; older age: up to 20/50 line |
| Color vision screening | Ishihara's Tests for Colour Deficiency<br>(Ishihara, 2018)        | All age groups: plates 1, 2, 6, 10, 14, and 18                      |
| Depression screening   | Bangla Montgomery–Åsberg Depression Rating Scale<br>(Soron, 2017) | All age groups: $\leq 9$                                            |

## References

- Ishihara, S. (2018). *Ishihara's Tests for Colour Deficiency: 38 plates edition*. Kanehara Trading Inc.
- Nasreddine, Z. S., Phillips, N. A., Bédirian, V., Charbonneau, S., Whitehead, V., Collin, I., Cummings, J. L., & Chertkow, H. (2005). The Montreal Cognitive Assessment, MoCA: A brief screening tool for mild cognitive impairment. *Journal of the American Geriatrics Society*, 53(4), 695–699. <https://doi.org/10.1111/j.1532-5415.2005.53221.x>
- Rosenbaum, J. (1982). *Rosenbaum Vision Pocket Screener*. Grass Instrument Company.
- Soron, T. R. (2017). Validation of Bangla Montgomery Åsberg Depression Rating Scale (MADRSB). *Asian Journal of Psychiatry*, 28, 41–46. <https://doi.org/10.1016/j.ajp.2017.03.019>
