# Supplementary material
Source: publisher figshare collection journal article supplement (https://asha.figshare.com/articles/dataset/_/22233664)
Supplement: Supplementary file 3 [file 1]

### **Supplemental Material S3. Language samples of one participant for all four picture types.**

#### **Culturally related high-context color photograph**

\$ Participant

- + Language: Bengali
- + ParticipantId: G1M4
- + Gender: M
- + Context: Nar
- + Examiner: SRC
- + Transcriber: BM
- 0:00

C dekh/INFte pa/cch/1i (umm) sondhe/bela ba rat/er somoy ebong (uhh) ghor/er moddh/LOCe ek/ti sofa/LOCe ek/ti lok bhodro/lok bos/INFe ach/3en ja/ke (uhh) ek/jon mohila ca/er cup/LOCe ca di/cch/3en [2EMB].

C ebong oi bhodro/lok/er pas/LOCe/EMPi sofa/LOCte ek/ti baccha bos/INFe ro/ech/3en ebong se (uhh) table/er opor/\*LOCe rekh/INFe ak/ch/3en kono ek/ta kagoj/LOCe.

C ar (uhh) thik tv/r samne ek/ti chair/LOCe ami dekh/INFte pa/cch/1i ek/ti meye bos/INFe ach/3en ebong se (uhh) phone ni/INFe phone/er dik/LOCe tak/INFe ro/ech/3en [EMB].

C ar (uhh) du/ti sofa/LOCe ulto dik/LOCe ami dekh/INFte pa/cch/1i ek/jon boyosko bhodro/lok bos/INFe ach/3en ji/ni paper por/ch/3en ebong ek/jon boyosko mohila bos/INFe ach/3en ji/ni tv/r dik/LOCe tak/INFe tv/LOCte show/ta dekh/ch/3en [3EMB].

C ebong tv/LOCte ami dekh/INFte pa/cch/1i je ek/ta (umm) program col/ch/3e [EMB].

- 0:50

#### **Culturally non-related high-context color photograph**

\$ Participant

- + Language: Bengali
- + ParticipantId: G1M4
- + Gender: M
- + Context: Nar
- + Examiner: SRC
- + Transcriber: BM
- 0:00

C ami aei chobi/ta/r moddh/LOCe (umm) ek/jon mohila/ke dekh/INFte pa/cch/1i ji/ni (umm) ek/jon lok/ke (umm) ek/ta glass ba ek/ta cup jatio jinis/LOCe kichu ek/ta coffee ba ca ho/INFe/to di/cch/3en [EMB].

C ebong ek/ta mohila laptop ni/INFe bos/INFe kaj kor/ch/3en ebong (umm) songe uni ek/ta kukur ona/r barir kukur/er sathe (umm) moja kor/ch/3en ba kotha bol/ch/3en.

C ebong (uhh) ami dekh/INFte pa/cch/1i je ek/jon bhodro/lok (uhh) uni bos/INFe paper por/ch/3en [EMB].

C ebong ar/ek/jon bhodro/lok/REPo ta/r pas/LOCe bos/INFe ro/ech/3en sofa/LOCe.

C ar ek/ti (uhh) meye (uhh) ti/ni/REPo sofa/LOCe bos/INFe ro/ech/3en opor/dik/LOCe se/khan/LOCe uni (uhh) ek/ta kagoj ebong ek/ta kolom ni/INFe kichu kaj kor/ch/3en.

C ar ami e/ta/REPo dekh/INFte pa/cch/1i je tv/LOCte (uhh) ona/der ek/ta (uhh) the spanish princess nam/LOCe kono ek/ta show ba kichu col/ch/3e [EMB].

C ebong (uhh) e/char/NOMa ghor/LOCe ami ar kichu (uhh) mane showpiece ebong aei jatio jinis dekh/INFte pa/cch/1i.

- 1:05

### **Culturally related black and white line drawing**

\$ Participant

+ Language: Bengali

+ ParticipantId: G1M4

+ Gender: M

+ Context: Nar

+ Examiner: SRC

+ Transcriber: BM

- 0:00

C ami dekh/INFte pa/cch/1i ek/jon mohila uni ca/er cup di/cch/3en ek/jon bhodro/lok/ke [EMB].

C ebong (uhh) ta/r pas/LOCe/CONi sofa/LOCe ek/jon (uhh) bos/INFte ach/3en ti/ni table/LOCe rakh/NOMa kono ek/ta kagoj ni/INFte ta/LOCte kono kichu lekh/NOMa (lekhi) ba ak/NOMa (aki) kor/ch/3e.

C ebong ek/ta tool/LOCe (uhh) tv/r pas/LOCe ami dekh/INFte pa/cch/1i ek/jon mohila bos/INFte ach/3en ti/ni hat/LOCe (uhh) kono ek/ta kichu ni/INFte (uhh) ta/r dik/LOCe ta/ke ro/ech/3en [EMB].

C du/to sofa ami dekh/INFte pa/cch/1i chobi/ti/r dan/dik/LOCe je/khan/LOCe ek/ta bhodro/lok bos/INFte ach/3en uni khabar/er kagoj por/ch/3en [EMB].

C ebong ta/r pas/er sofa ta/te/CONi ek/jon mohila bos/INFte ro/ech/3en.

C ami e/ta/REPo dekh/INFte pa/cch/1i je tv/LOCte kono rokom kichu ek/ta col/ch/3e program [EMB].

C ho/INFte ge/ch/3e.

- 0:45

### **Culturally non-related black and white line drawing**

\$ Participant

+ Language: Bengali

+ ParticipantId: G1M4

+ Gender: M

+ Context: Nar

+ Examiner: SRC

+ Transcriber: BM

- 0:00

C ami dekh/INFte pa/cch/1i e/khan/LOCe ek/jon mohila uni ek ek/jon lok/ke (uhh) ca/er cup ebong ba coffee/r cup kichu ek/ta uni di/cch/3en ona/ke [EMB].

C ebong ek/ta meye sofa/LOCe bos/INFte uni (uhh) pen ni/INFte kichu ek/ta lekh/NOMa (lekhi) kor/ch/3en.

C ami e/ta/REPo dekh/INFte pa/cch/1i je ar/ek/ta sofa/LOCte ek/jon mohila bos/INFte ach/3en ebong ek/ta kukur/er sathe uni mane ona/r sathe interact kor/ch/3en kotha bol/NOMa/r cesta kor/ch/3en [EMB].

C ebong ona/r samne ek/ta kichu khol/NOMa ro/ech/3e (uhh) laptop ho/INFte par/3e ba boi ho/INFte par/3e [EMB].

C (uhh) ami e/ta/REPo dekh/INFte pa/cch/1i je (uhh) du/jon bhodro/lok (uhh) sofa/LOCe bos/INFe ro/ech/3en se/khan/LOCe (uhh) ek bhodro/lok paper ba kagoj kichu ek/ta por/ch/3en ebong ar/ek bhodro/lok pas/LOCe bos/INFe ro/ech/3en [EMB].

C (uhh) ar tv (uhh) moto ek/ta kichu col/ch/3e je/khan/LOCe the spanish princess namok kono program col/ch/3e [EMB].

- 0:55

## Language samples of three different participants from each age group for one particular picture stimulus

### Group1

\$ Participant

+ ParticipantId: G1F1

+ Gender: F

+ Context: Nar

+ Examiner: SRC

+ Transcriber: BM

- 0:00

C e/ta/REPo to sei (uhh) prothom je chobi/ta dekh/echi/1/am (umm) je/ta sketch/chi/1/3o se/ta/r/CONi (umm) version/ta mon/INFe ho/cch/3e [2EMB].

C to (uhh) se/rokom/CONi.

C e/ta to dekh/INFe thanda/r des/CONi mon/INFe ho/cch/3e karon ek/ta fire place ro/ech/3e.

C fire place to ama/der gorom/er desh/LOCe thak/3e na khub ek/ta kintu tokhon hoi/to khub ek/ta thanda por/3e/ni.

C fire place hoi/to o/ra winter/LOCe use kor/3e kintu e/ta hoi/to summer.

C e/der dress dekh/INFe mon/INFe ho/cch/3e summer karon e/khan/LOCe choto baccha meye/ti/REPo half pant por/INFe ach/3e ar hoi/to ji/ni bair/LOCe theke es/ch/2en bol/INFe ama/r prothom chobi/ta/LOCe mon/INFe ho/echi/1/3o ti/ni/REPo half pant por/INFe ach/3en [3EMB].

C to e/ta to thanda/r posak keu por/ech/3e bol/INFe mon/INFe ho/cch/3e na.

C ekhan/LOCe ek/ta tv chol/ch/3e spanish princess ekhan/LOCe (uhh) cinema/CONi ho/b/3e ho/cch/3e hoi/to.

C ar (uhh) khub sundor ek/ta cupboard/LOCe saj/Ca/NOMno ro/ech/3e (sundor ek/ta) (show\*) showcase moto (saja/NOMno ro/ech/3e).

C se/khan/LOCe nana/rokom show piece ro/ech/3e je/ta ama/r football bol/INFe mon/INFe ho/echi/1/3o se/ta football mote/EMPi na se/ta ek/ta plate bodh ho/3e oi plate/er opor kaj kor/NOMa thak/3e o/rokom/CONi kichu mon/INFe ho/cch/3e [EMB].

C to e/ra chistian family mon/INFe ho/cch/3e karon e/khan/LOCe ek/ta cross ro/ech/3e.

C ar sundor ek/ta lamp post flower vase chobi hoi/to ka\* e/der choto/bela/r chobi mon/INFe ho/cch/3e ek/ta ro/ech/3e age/r chobi e/rokom onek kichu family picture/s [EMB].

C baccha/ta/r hoi/to hat/LOCe kaj kor/NOMa ek/ta card/REPo ro/ech/3e e/khan/e ek/ta sundor ro/ech/3e.

C (uhh) morog (torog) kichu ek/ta ek/ech/3e.

C ar e/khan/e e/ta aina bheb/echi/1/am e/ta to (aina/CONi) ekhon/REPo ama/r aina/CONi mon/INFe ho/cch/3e.

C ar aina/r car/pas/LOCe design kor/NOMa fire place/er opor/LOCe [EMB].

C ar e/ta/ke ami bheb/echi/l/am chata kintu e/ta asol/LOCe chata no/3e e/ta broom bol/INFe mon/INFe ho/cch/3e ekhon color/AGe.

C ar ek/jon khabar/er\* kagoj por/ch/3en ar ek/jon/er hate/REPo ek/ta magazine ba khabar/er\* kagoj kichu ro/ech/3e halka side die dekh/NOMa ja/cch/3e kintu amar pichon theke dekh/INFe mon/INFe ho/cch/3e ona/r dristi/ta tv/r dike [2EMB].

C ar e/dike (uhh) aei mohila khel/NOMa kor/ch/3e kukur/ta/r sathe ek hat/LOCe abar samne (uhh) couch/er modhe (uhh) laptop/REPo ro/ech/3e [EMB].

C laptop/LOCe kaj kor/INFte kor/INFte hoi/to hotath/EMPi kukur/ta col/INFe es/echi/l/3o.

C ar e bodh ho/3e kichu likh/ch/3e aei baccha meye/ti (bodh ho/3e kichu likh/ch/3e) ek/ta page/er opor hat/LOCe pencil o/ta sada/LOCe sada/chi/l/3o bol/INFe page/ta ager/ta/LOCe bujh/INFte par/li/ni.

C ar ja/ke dekh/INFe ama/r mon/INFe ho/echi/l/3o hoi/to bair/LOCe theke sobe es/ch/3en ama/r ekhon/REPo mon/INFe ho/cch/3e uni hoi/to bair/LOCe theke/CONi sobe es/ch/3en [2EMB].

C es/INFe bos/ech/3en ona/ke ca offer kor/NOMa ho/cch/3e khub anondito ho/3e/EMPi (ona/ke ca offer kor/NOMa ho/cch/3e).

C ho/INFe gech/3e.

- 2:25

## Group2

\$ Participant

+ Language: Bengali

+ ParticipantId: G2F1

+ Gender: F

+ Context: Nar

+ Examiner: SRC

+ Transcriber: BM

- 0:00

C accha sofa/LOCe bos/INFe thak/NOMa ek/jon bhodro/lok/LOCke bhodro/mohila ca di/cch/3en ca coffee kichu ek/ta ho/b/3e.

C accha ek/jon sofa/LOCe bos/INFe table/LOCe kichu likh/ch/3e samne onek boi khata kichu rakh/NOMa ach/3e [EMB].

C accha e/khan/LOCe ek/ta kukur bos/NOMa ach/3e kukur/ta/LOCke (ek\*) ek/jon bhodro/mohila kichu khe/INFte di/cch/3e mon/INFe ho/cch/3e ar samne ta/r ek/ta laptop khol/NOMa ach/3e ha (laptop) ro/ech/3e [EMB].

C accha e/khan/LOCe sofa/LOCe bos/INFe ek/jon boyosko bhodro/lok (umm) por/ch/3en kichu khabar/er kagoj ar ta/r pas/LOCe ek/jon bos/INFe ach/3e (hmm).

C accha e/khan/LOCe dekh/NOMa ja/cch/3e the spanish ek/ta princess ek/ta iye lekh/NOMa lag/Ca/NOMno ach/3e [EMB].

C accha pichon/LOCe ek/ta table ach/3e ta/r opor/LOCe ek/ta (uhh) plate ba kichu jatiyo/r opor/LOCe boi (boi) type/er kichu rakh/NOMa ach/3e.

C accha ar aei pichon/LOCe/REPo ek/ta X table ach/3e table/LOCe kichu kagoj ar ei/ta ki dekha/cch/3e e/ta mon/INFe ho/3e paperweight type/er kichu ek/ta ho/b/3e na ba ek/ta boro ek/ta patro type/er kichu ho/b/3e e/ta bujh\* bujh/INFte par/ch/li na ekdom/EMPi [EMB].

C accha e/khan/LOCe tv tv/r iye/r pas/LOCe ek/ta stand moto kichu ach/3e kono>

C e/ta ki jinis?

C accha tv/r opor/LOCe showcase/ta/r opor/LOCe ek/ta (uhh) phuldani ach/3e ta/r opor/LOCe ek/ta phul/er chobi moton ach/3e.  
C e/dik/LOCe e/khan/LOCe ek/ta showcase moton ach/3e.  
C aei bhodro/lok/er pichon/LOCe ek/ta janla ach/3e.  
C accha e/khan/LOCe ek/ta bhison boro ek/ta showcase moton ach/3e ja/r moddh/LOCe onek jinis saj/Ca/NOMno ach/3e ta/r opor/LOCe (uhh) gan sona/r jontro ach/3e du/dik/LOCe [EMB].  
C accha bhetor/LOCe ek/ta lampshade ach/3e iye ach/3e tar/por/LOCe ek/ta phuldani moton ach/3e.  
C accha e/khan/LOCe kichu (umm) electric kichu ek/ta kono boi ach/3e ta/r opor/LOCe ek/ta electric kichu ach/3e.  
C accha e/dik/LOCe accha e/khan/LOCe photoframe ach/3e koek/ta.  
C accha (e/khan/LOCe) e/khan/LOCe/REPo showpiece moto onek kichu saj/Ca/NOMno ach/3e boi ach/3e e/khan/LOCe/REPo photoframe ach/3e X ek/ta phuldani ach/3e je/khan/LOCe saj/Ca/NOMno/r moton [EMB].  
C accha e/rokom ami choto choto onek/gulo phuldani/r moton ach/3e.  
C e/khan/LOCe/REPo ek/jon/er photoframe/er moton ach/3e.  
C e/dik/LOCe motamuti sob>  
C e/khan/LOCe ek/ta kichu rakh/NOMa ach/3e jinis/ta ami bujh/INFte par/ch/li na e/ta (e/ta) ki jinis [EMB]?  
C X tv/r samne ei/pas/LOCe ek/ta jinis rakh/NOMa ach/3e e/ta ashtray noi (ashtray) X>  
C ar mejhe/LOCte ek/ta e/khan/LOCe kichu por/INFte ach/3e lal rong/er gol type/er kichu [EMB].  
C ha ar ar ar motamoti ar kichu dekh/INFte par/ch/li na.  
C ar kichu>  
C na ho/INFte ge/ch/3e.  
- 2:55

### Group 3

\$ Participant

+ Language: Bengali

+ ParticipantId: G3F1

+ Gender: F

+ Context: Nar

+ Examiner: SRC

+ Transcriber: BM

- 0:00

C boyosko bhodro/lok paper por/ch/3e.

C ar ar/ek/ta bhodro/lok ta/r pas/LOCe bos/INFte ach/3en.

C X ta dekh/ch/3en bhodro/mohila (dekh/ch/3en).

C ar (umm) young boyosi meye/ta laptop khul/ech/3e.

C ar bhodro/lok bhodro/mohila mobile ba ca X (ca) na ca di/cch/3e bodh ho/3e (ca di/cch/3e).

C husband wife (umm) (wife) husband/ke ca di/cch/3en.

C ar ba\* bari/LOCte ek/ta (umm) tv ach/3e (umm) showcase/LOCe.

C ar kono kichu apna/r photo ach/3e ta/r/por/LOCe botol ach/3e (ta/rpor/LOCe) toma/r (umm) kichu statue ach/3e (ta/r/por/LOCe) (umm) kichu phul/er phul/dani ach/3e (ta/r/por/LOCe) toma/r table/LOCe boi potro ach/3e.

C ta/r/por/LOCe meye ek/ta (meye) abar (umm) boi/er dik/LOCe tak/INFe ach/3e khata ba (boi/er dik/LOCe tak/INFe ach/3e).

C ar aei to dekh/ch/li.

C ar ek/ta janla ach/3e pas/LOCe ek/ta table ach/3e [EMB].

C ar ek/ta chobi ach/3e calender moton.

C ar sound (sound) box ach/3e car/te du/to.

C X ta/r opor/LOCe ek/ta phul/dani ach/3e.

C e/gulo bol/INFte ho/b/3e aei je toma/r XX ki light bol/3e e/ta/ke ta/r/por/LOCe toma/r phul/dani (ta/r/por/LOCe) chobi (ta/r/por/LOCe) ghor (chobi ghor) e/ta X (ta/r/por/LOCe phul/dani) phol (ghor chobi ta/r/por/LOCe toma/r) ek/ta (umm) (phol) (phul/dani) mon/INFe ho/3e phol/er moton ach/3e e/ta (ek/ta phul/dani ach/3e) chobi ach/3e (chobi ach/3e) [2EMB].

C phul/dani moton rekh/ech/3e ek/ta X (rekh/ech/3e) chobi rekh/ech/3e (chobi chobi).

C e/ta thik bujh/INFte par/ch/li na e/ta ki.

C hmm.

- 3:09
