# Supplementary material
Source: publisher figshare collection journal article supplement (https://asha.figshare.com/articles/dataset/_/22233664)
Supplement: Supplementary file 4 [file 1]

**Supplemental Material S4.** Education groups based on total years of institutional education.

| <b>Education Groups</b> | <b>Number of Participants</b> | <b>Years of Institutional Education</b> |
|-------------------------|-------------------------------|-----------------------------------------|
| 1.                      | 2                             | $\leq 11$                               |
| 2.                      | 3                             | 12                                      |
| 3.                      | 65                            | 13–16                                   |
| 4.                      | 19                            | 17–18                                   |
| 5.                      | 7                             | $\geq 19$                               |
